# Supplementary material for: Efficient elimination of pancreatic cancer stem cells by hedgehog/GLI inhibitor GANT61 in combination with mTOR inhibition
Source: PubMed Central journal article supplement (PMC4924257; doi:10.1186/s12943-016-0534-2), 2016-06-27

Additional file for Y. Miyazaki et al.

**Efficient elimination of pancreatic cancer stem cells  
by Hedgehog/GLI inhibitor GANT61 in combination  
with mTOR inhibition**

Additional file 1: Table S1

Tumorigenesis of pancreatic cancer cell lines in NOD/SCID mice.

| Cell line                  | Number of cells<br>for implantation | tumorigenesis |
|----------------------------|-------------------------------------|---------------|
| Capan-1 CD133 <sup>+</sup> | 1000                                | 5/5           |
| Capan-1 CD133 <sup>-</sup> | 1000                                | 0/5           |
| PANC-1 (unsorted cells)    | 1000                                | 3/3           |

A

Negative controls (without 1<sup>st</sup> antibodies)

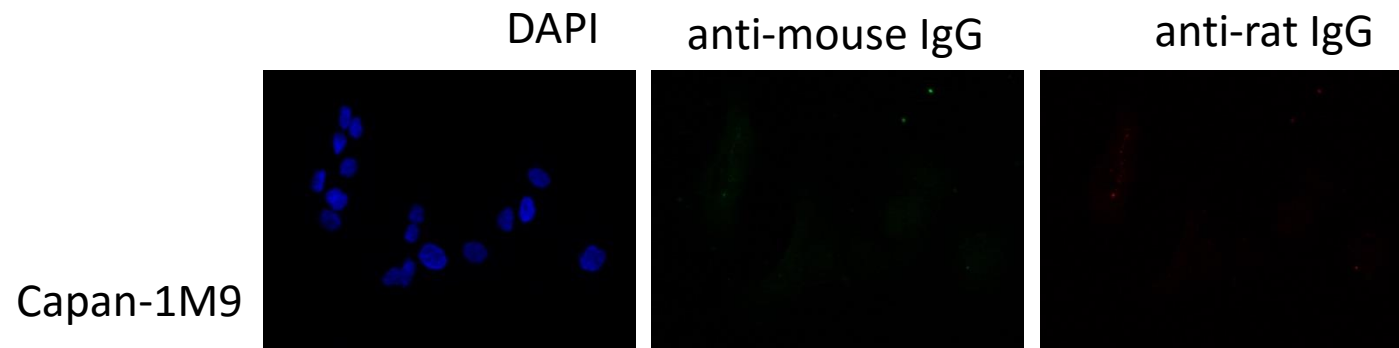

B

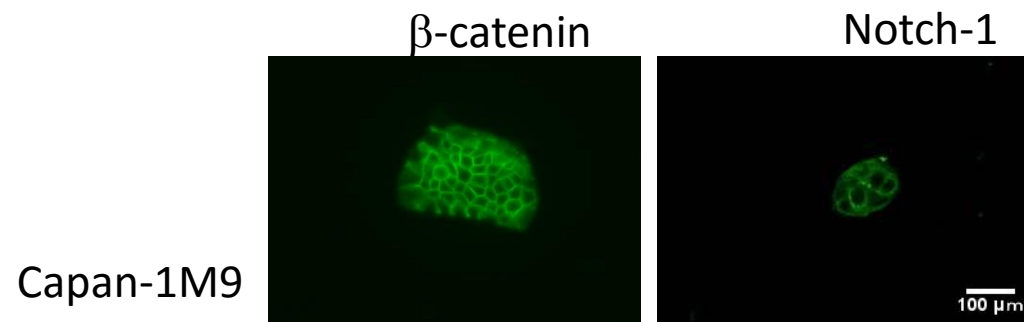

Additional file 1: Figure S1

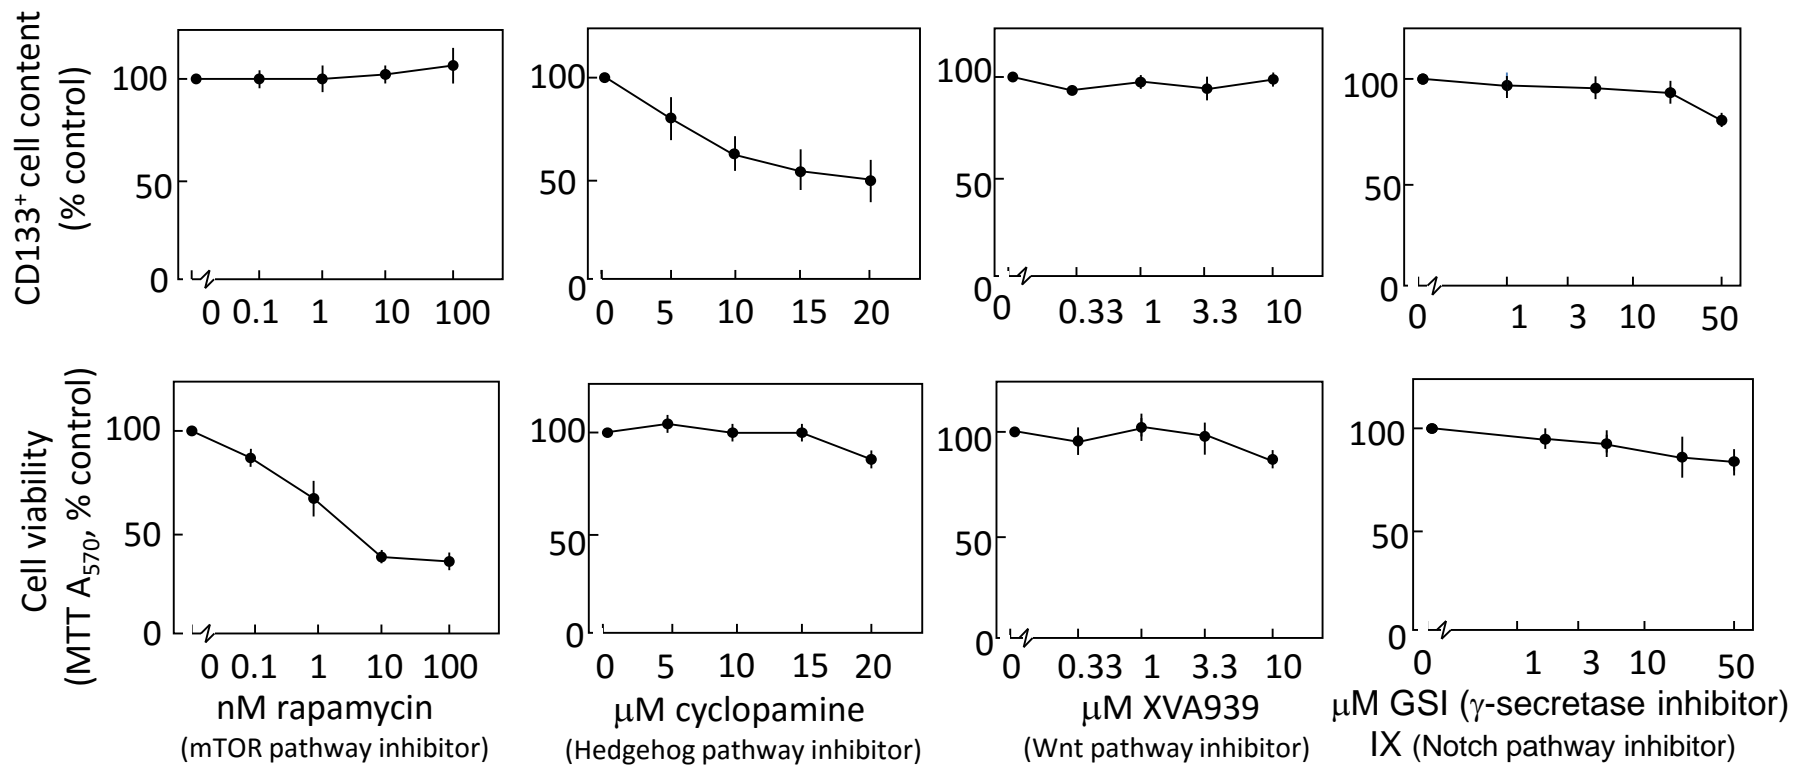

Additional file 1: Figure S2

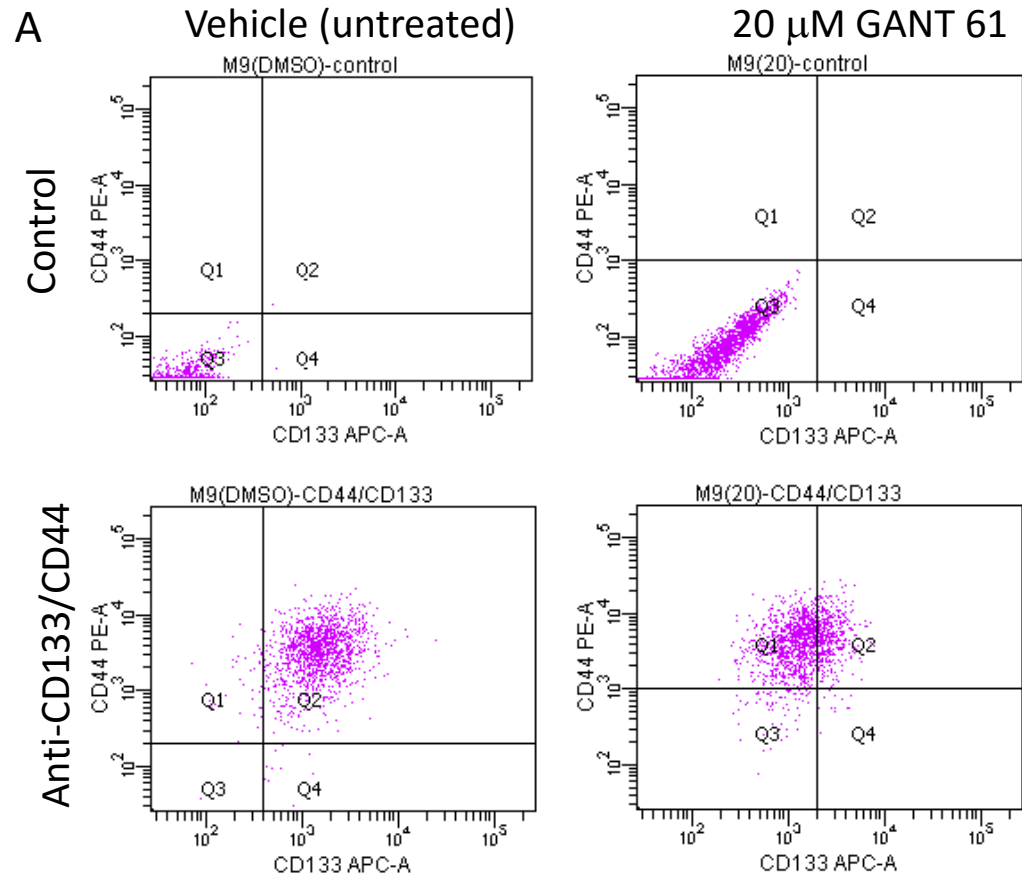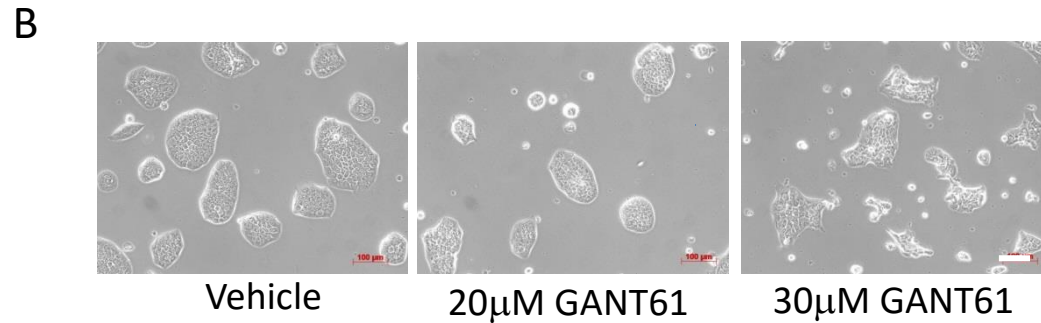

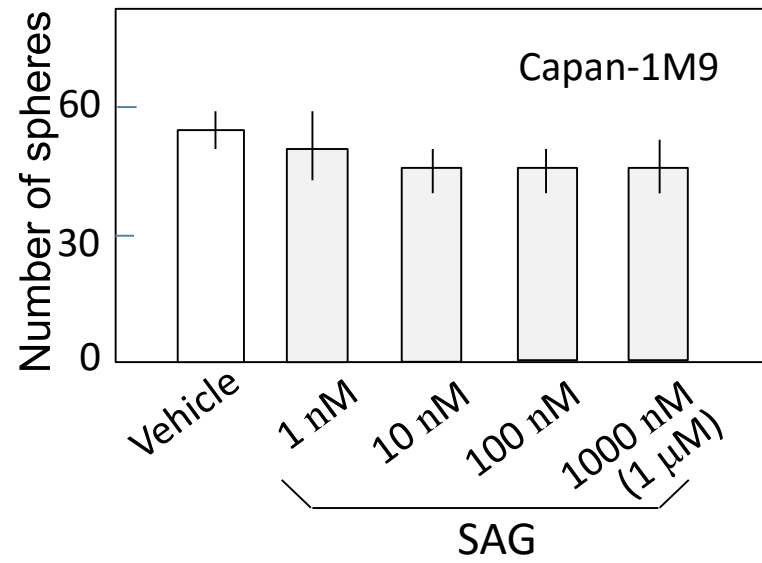

A  $10^3$  cells/24 well

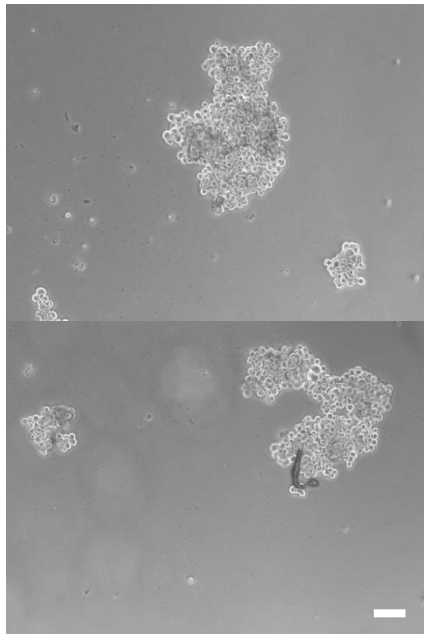

B 1.2 cells/96 well

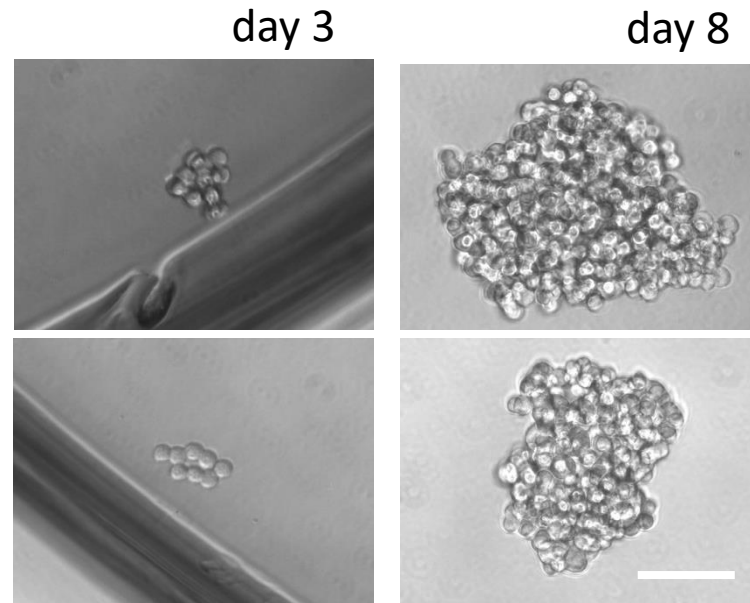

Additional file 1: Figure S5

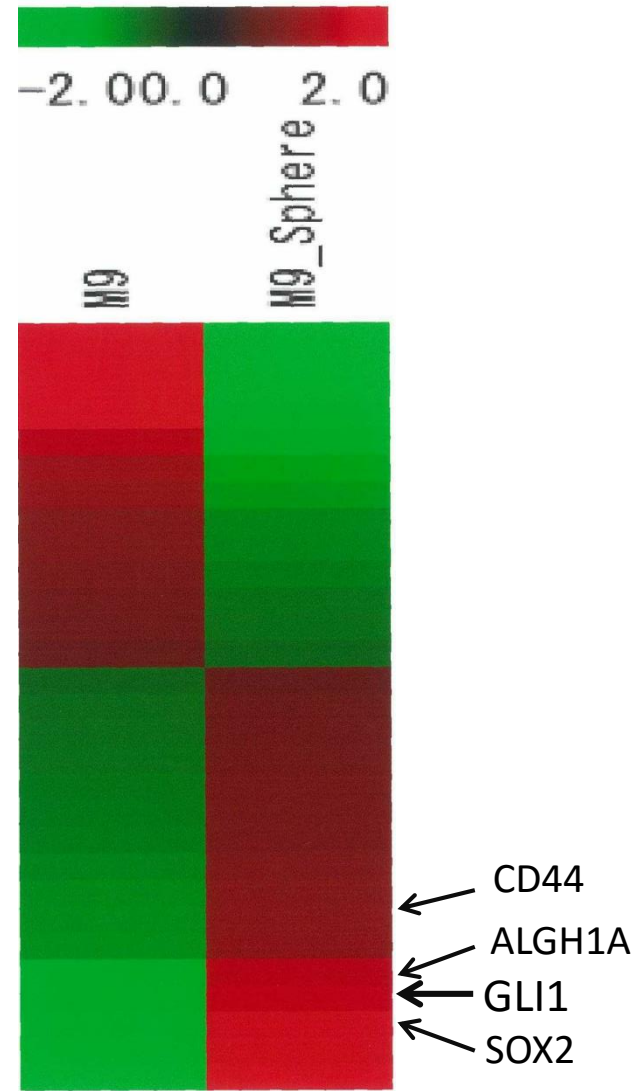



A

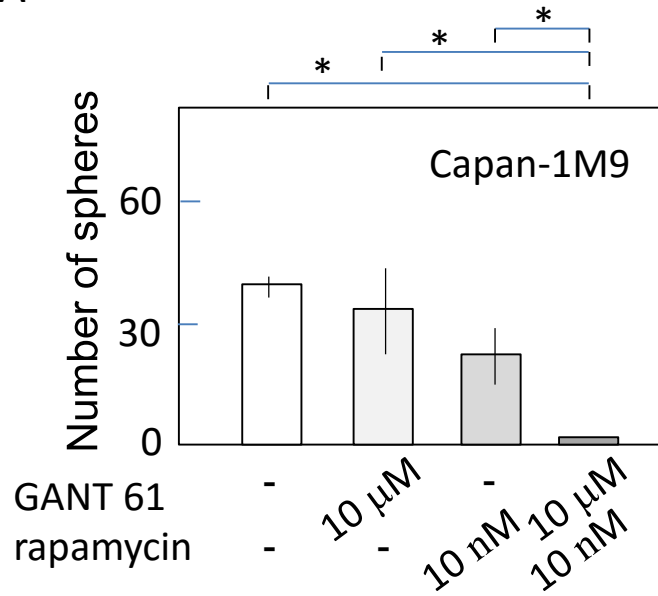

B

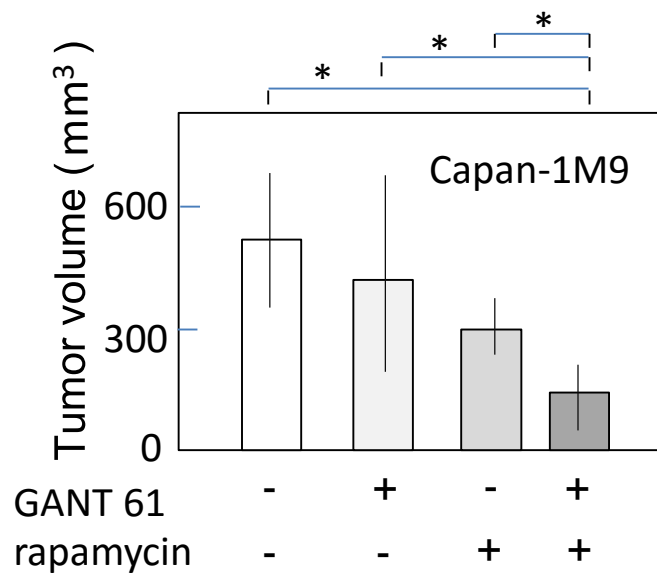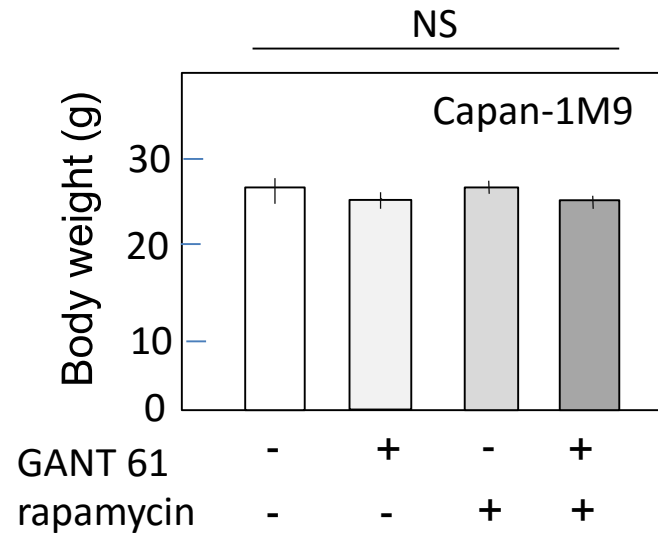

# KRAS/PI3K/Akt/mTOR pathway

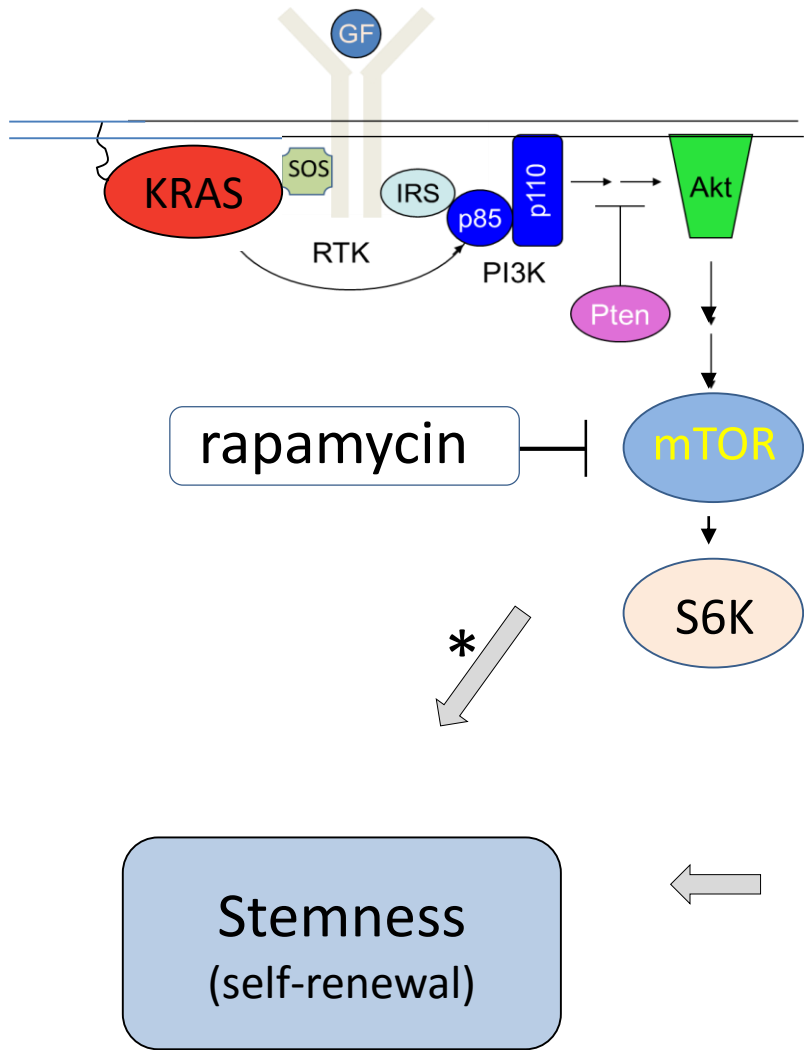

# Hedgehog pathway

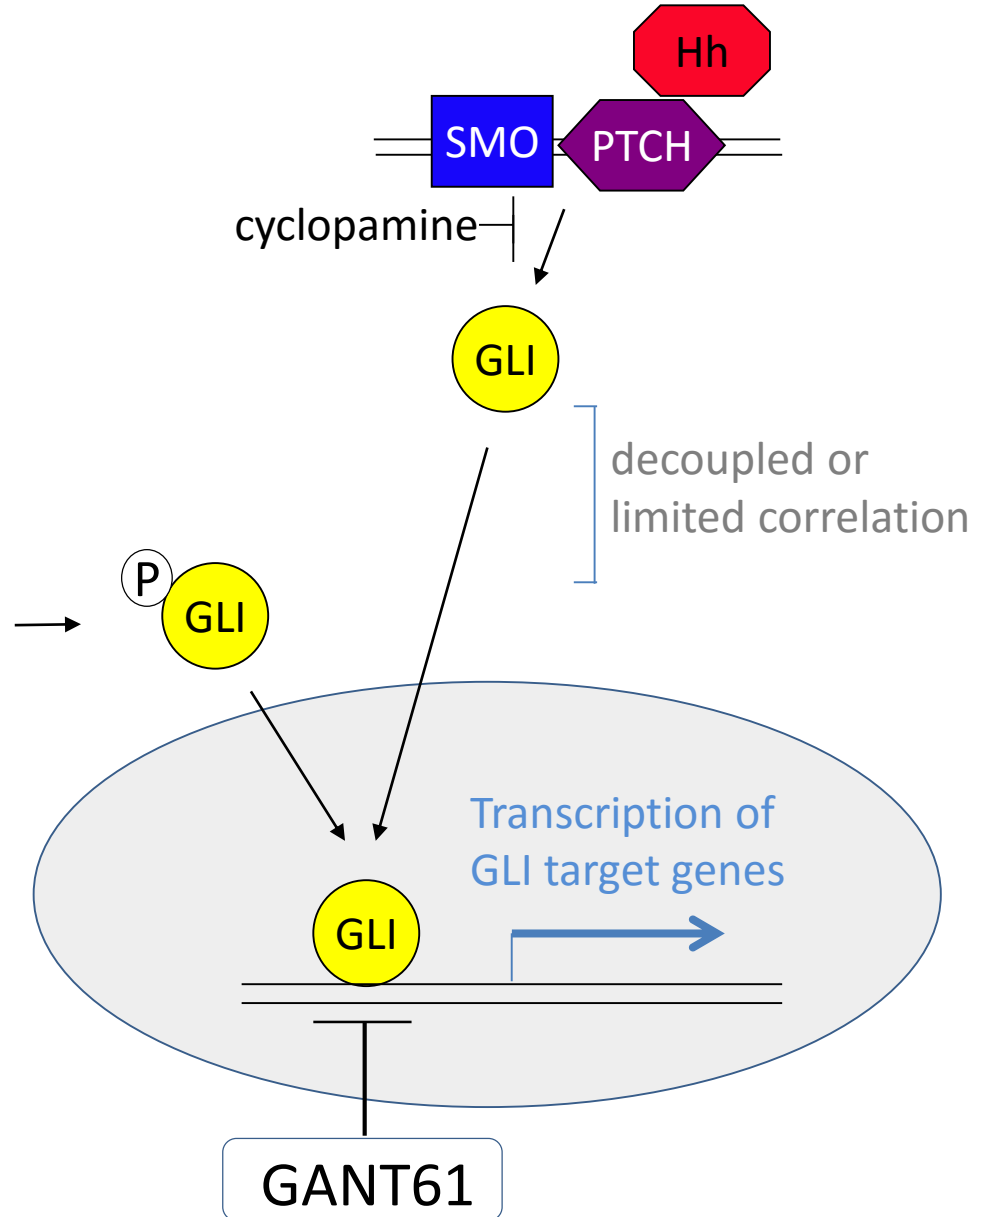

Supplement: 12943_2016_534_MOESM1_ESM.pdf [file 12943_2016_534_MOESM1_ESM.pdf]
